# Supplementary material for: An efficient visible light photocatalyst based on tin porphyrin intercalated between TiO2–graphene nanosheets for inactivation of E. coli and investigation of charge transfer mechanism
Source: Royal Society of Chemistry journal article supplement (doi:10.1039/c5ra19927a), 2016-01-01
Supplement: c5ra19927a1.pdf [file c5ra19927a1.pdf]

## **An efficient visible light photocatalyst based tin porphyrin intercalated between TiO<sub>2</sub>-graphene nanosheets for inactivation of *E. coli* and investigation of charge transfer mechanism**

S. Zargari<sup>a</sup>, R. Rahimi<sup>a\*</sup>, A. Yousefi<sup>b</sup>

---

<sup>a.</sup> *Department of Chemistry, Iran University of Science and Technology, Tehran 16846-13114, Iran.*

<sup>b.</sup> *Biotechnology Research Laboratory, School of Chemical Engineering, Iran University of Science and Technology, Tehran 16846-13114, Iran.*

### **SEM analysis**

The structured morphology of the TiO<sub>2</sub>, TG (3%), and TGSP photocatalysts are shown in Fig. 1. It is clear that the graphene sheets were packed densely by TiO<sub>2</sub> nanoparticles with the average sizes of 38 nm. As it can be seen in the SEM image of the TG nanocomposite, significant aggregation of the TiO<sub>2</sub> nanoparticles is observed in the TG nanocomposite.

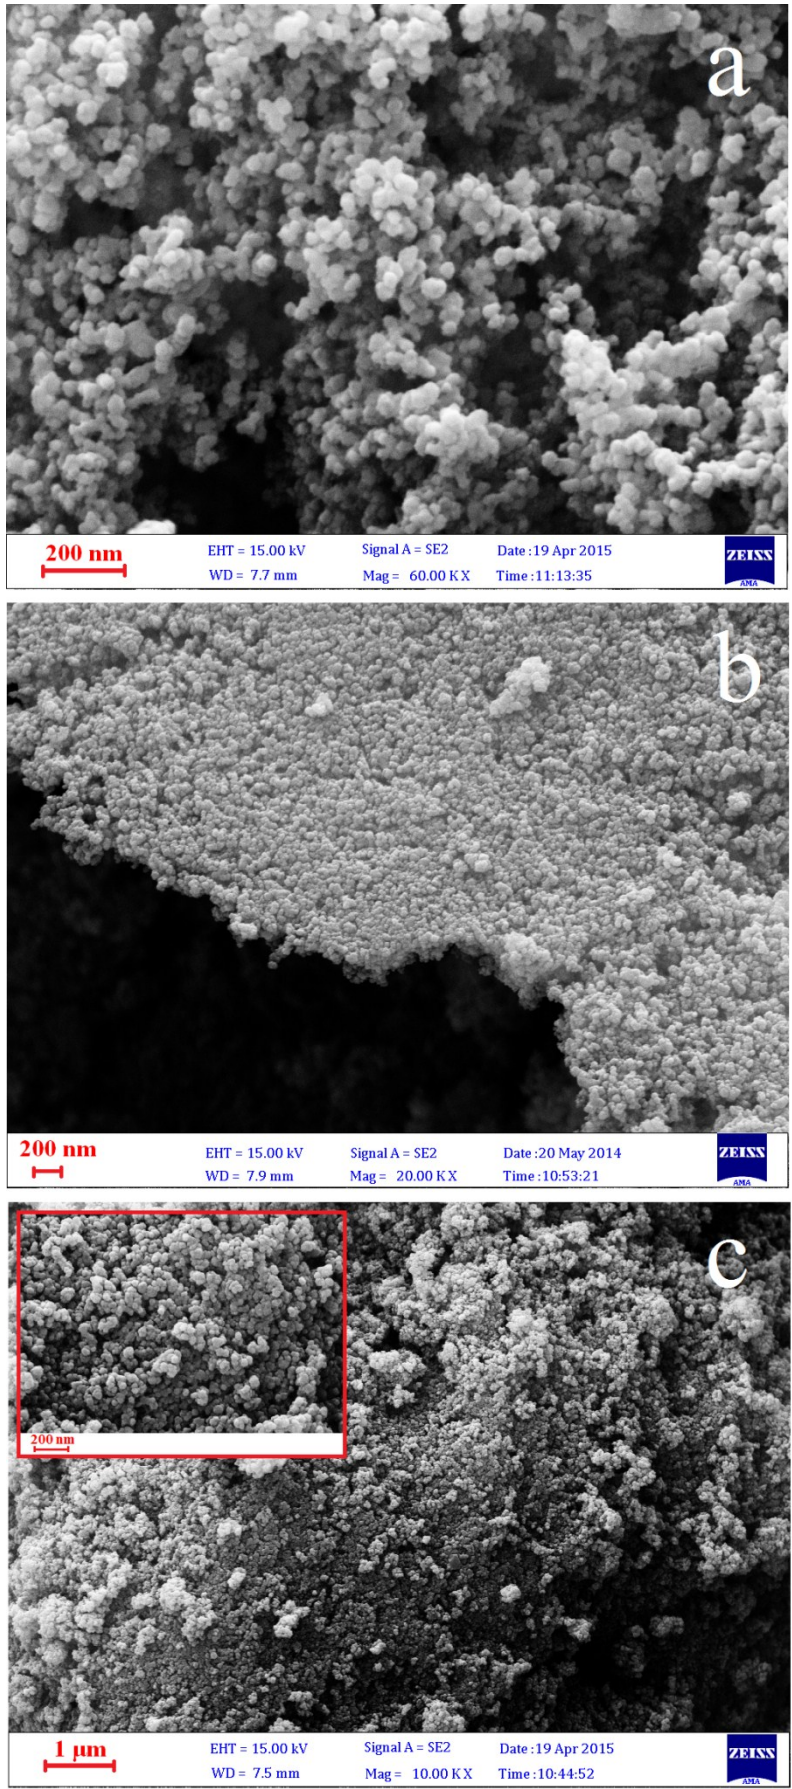

Fig. 1. SEM images of a)  $\text{TiO}_2$ , b) TG (3%), and c) TGSP
